# Supplementary material for: Diverse Genotypes and Species of Cryptosporidium in Wild Rodent Species from the West Coast of the USA and Implications for Raw Produce Safety and Microbial Water Quality
Source: MDPI journal article supplement (doi:10.3390/microorganisms9040867), 2021-04-17
Supplement: s1 [file s1]

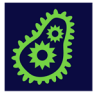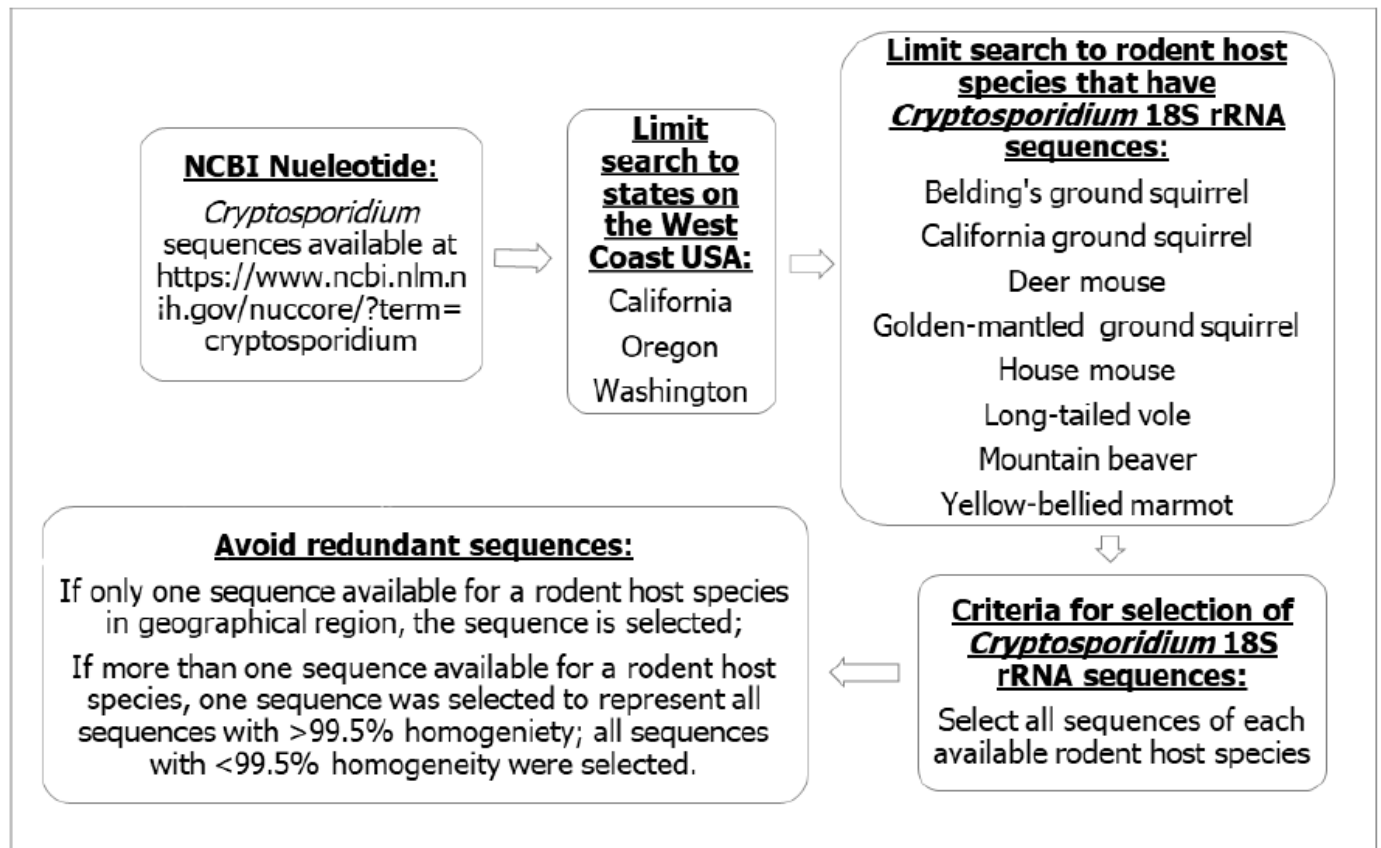

**Figure S1.** Schematic flow chart for selection of *Cryptosporidium* 18S rRNA sequences obtained from wild rodents trapped from the west coast, USA.
